# Supplementary material for: Halogenation reactions in biodegradable solvent: Efficient bromination of substituted 1-aminoanthra-9,10-quinone in deep eutectic solvent (choline chloride : urea)
Source: Royal Society of Chemistry journal article supplement (doi:10.1039/b923589b), 2010-01-01

# Characterization of Products

## FTIR Spectra

*1-amino-2,4-dibromoanthracene-9,10-dione*

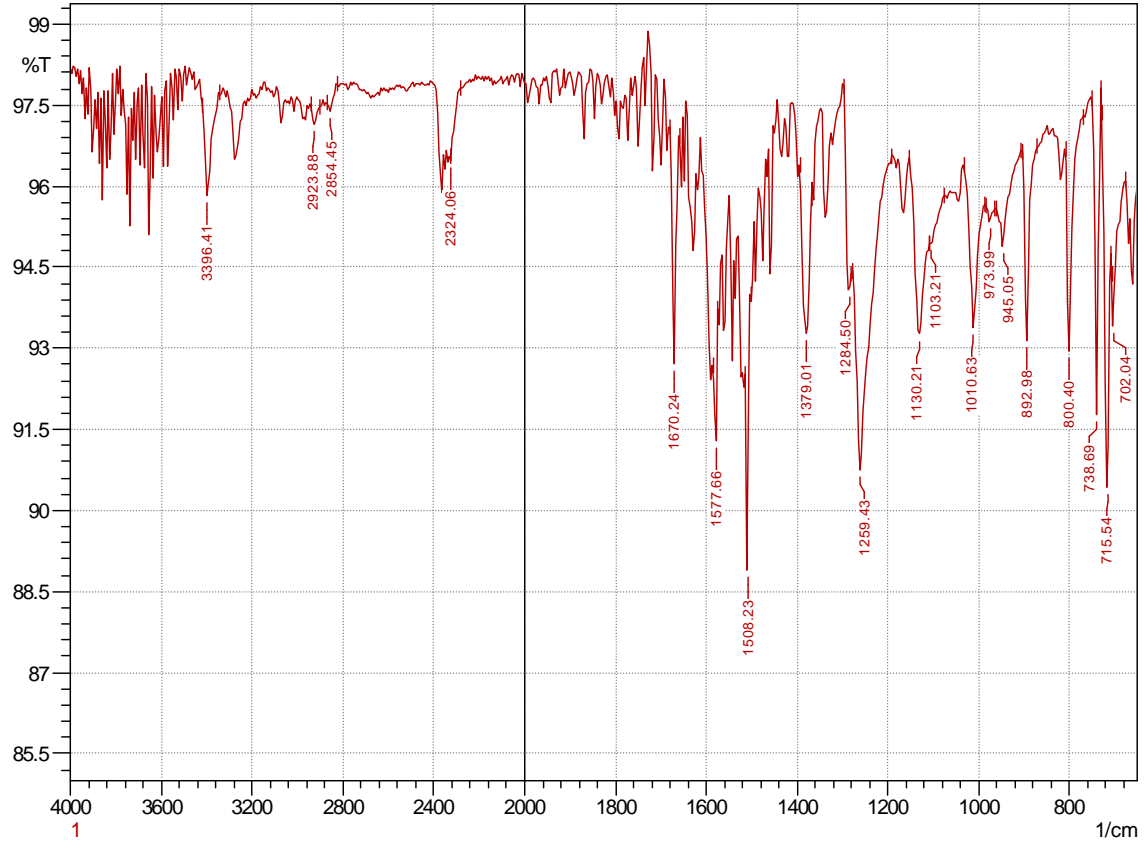

*1-amino-2,4-dibromo-5-chloroanthracene-9,10-dione*

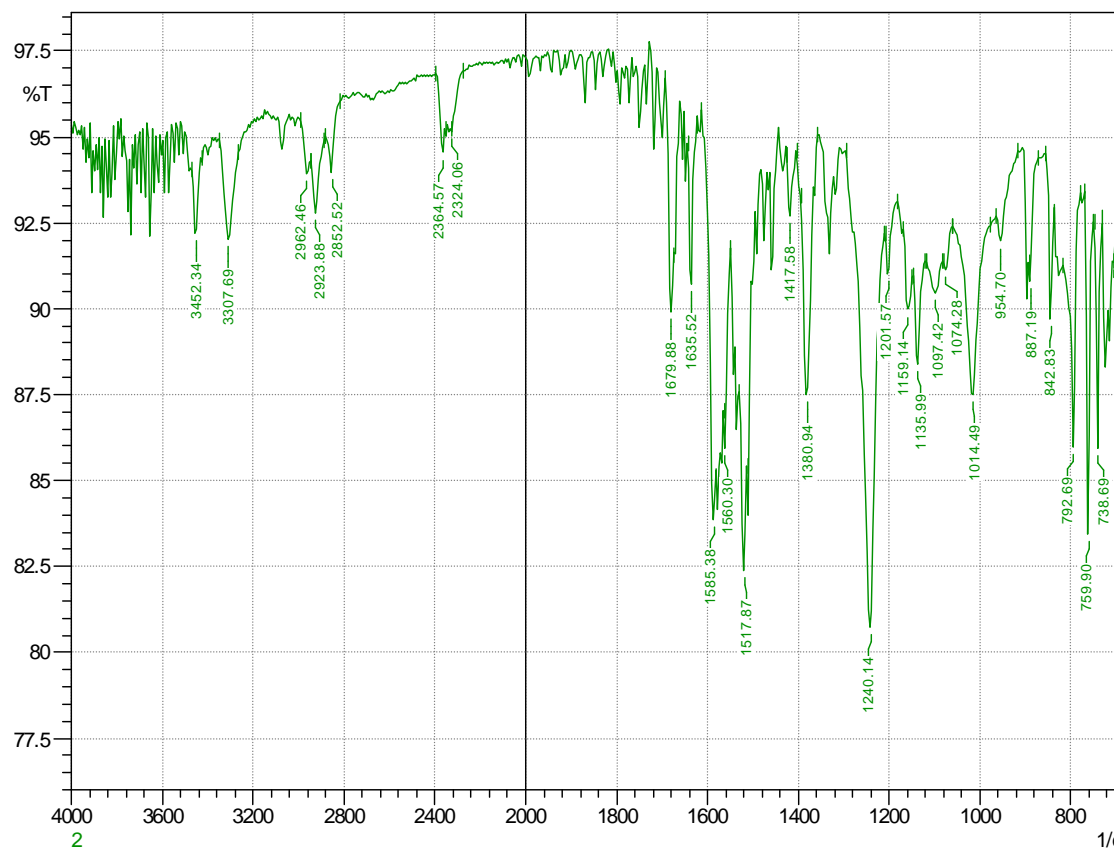

1,5-diamino-4,8-dibromoanthracene-9,10-dione

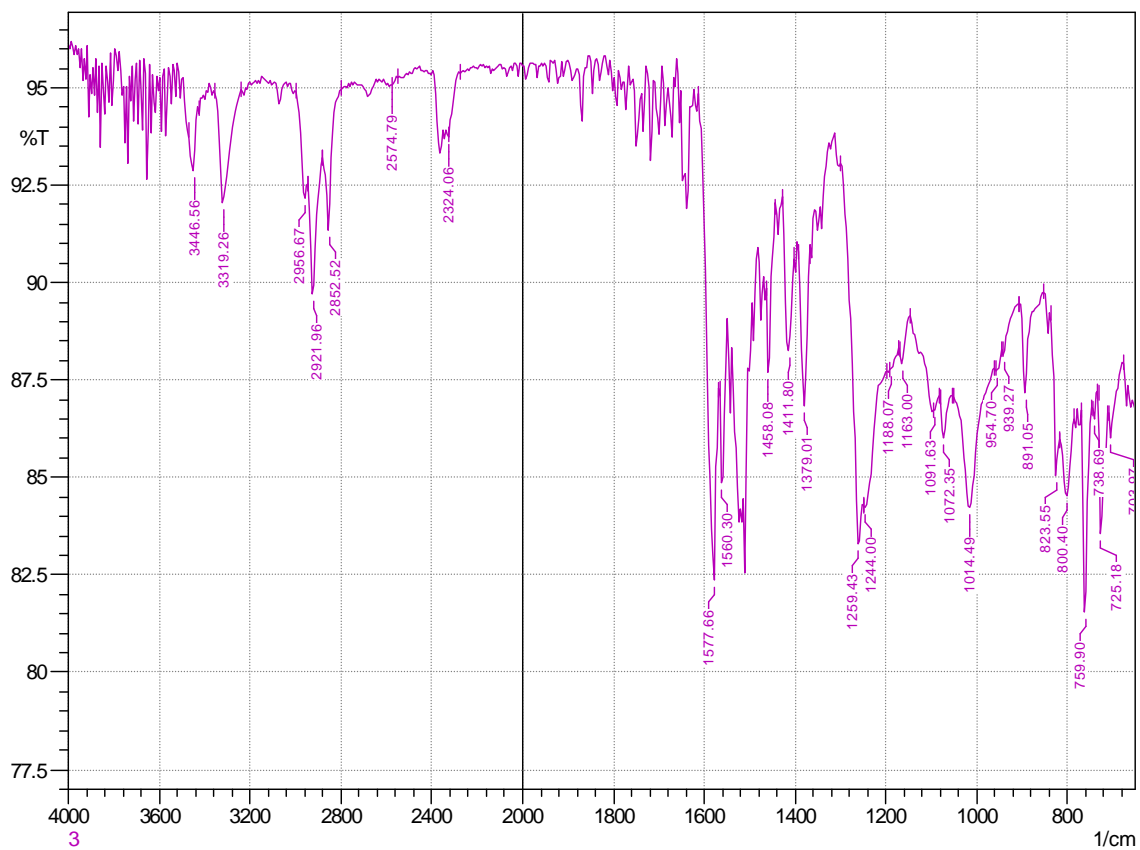

*1-bromo-4-(methylamino)anthracene-9,10-dione*

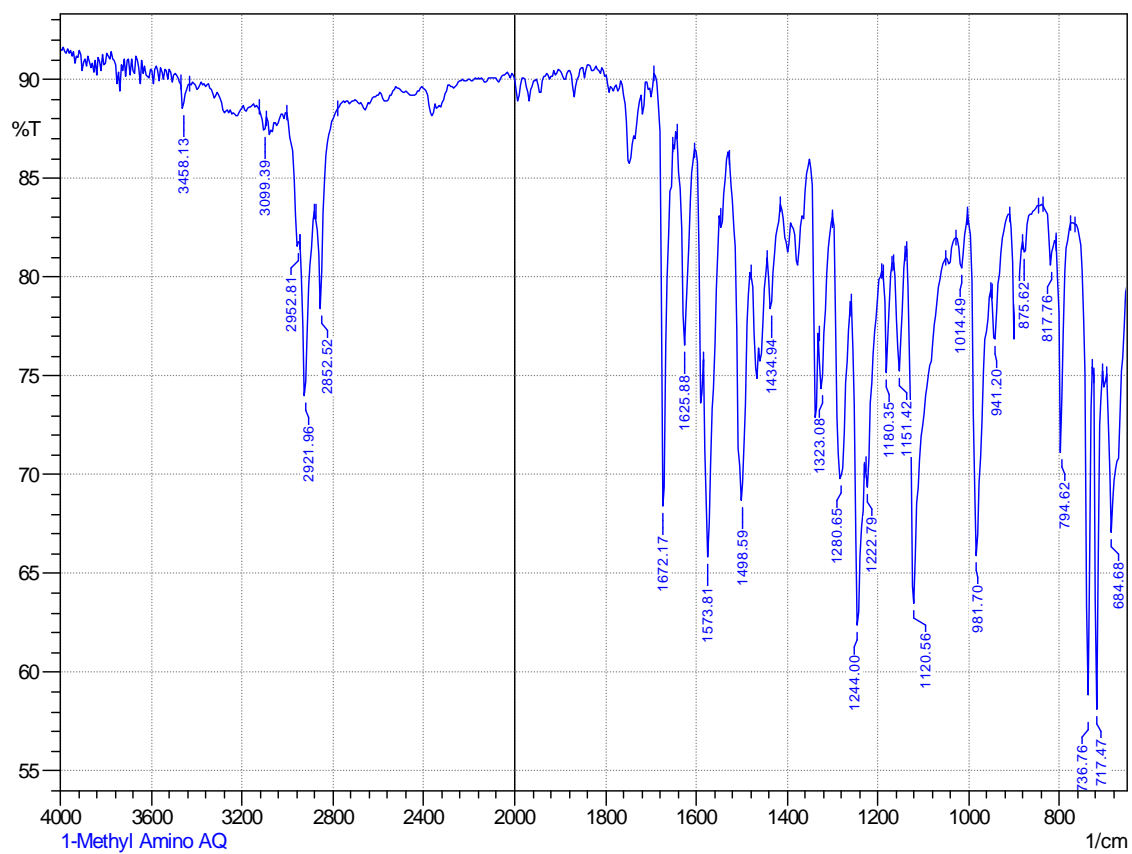

*1-amino-2-bromo-4-methoxyanthracene-9,10-dione*

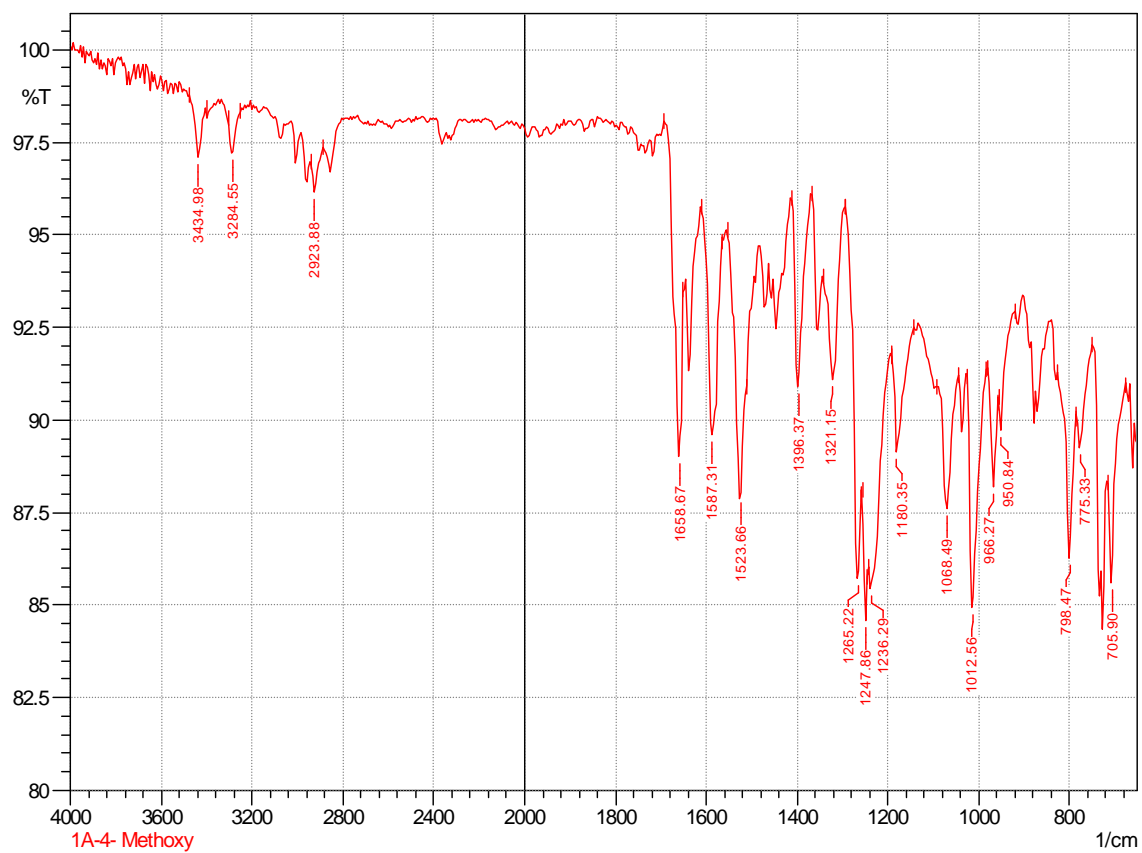

N-(1-Amino-2-bromo-9,10-dihydro-9,10-dioxoanthracen-4-yl) benzamide

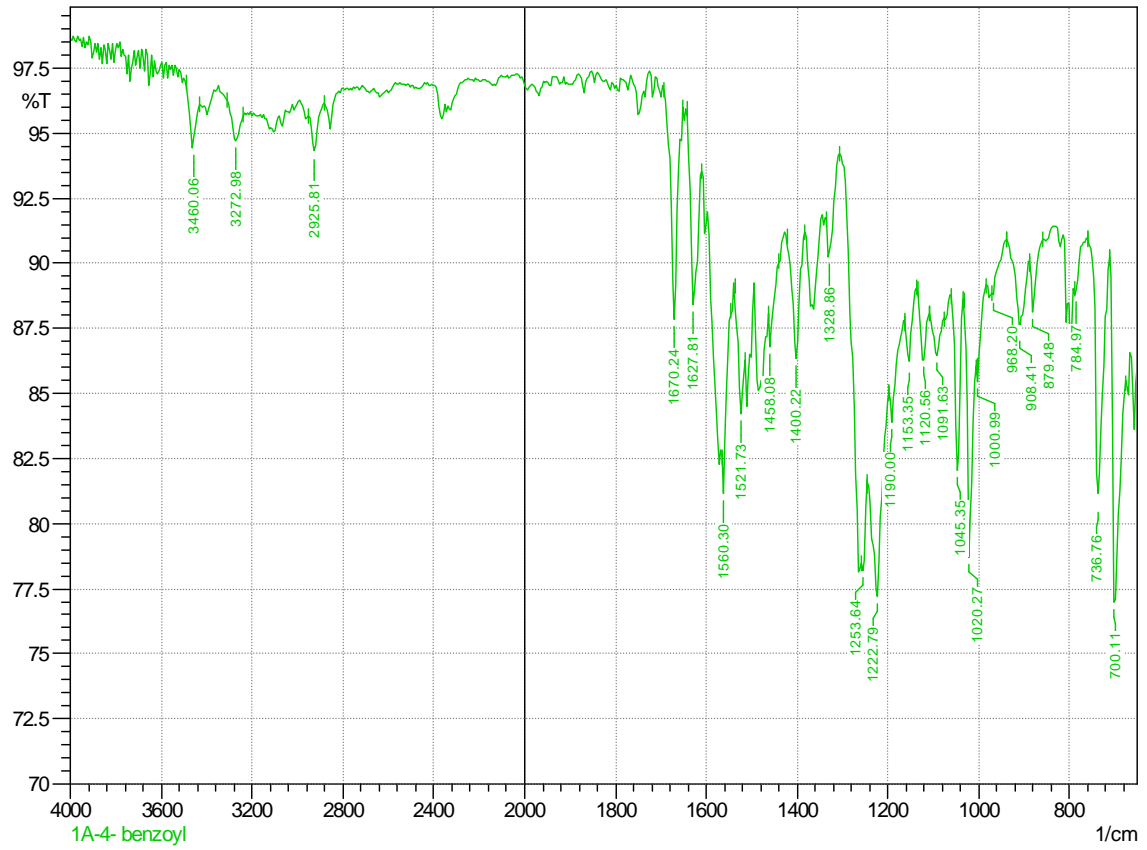

*1-Amino-2-bromo-4-hydroxyanthracene-9,10-dione*

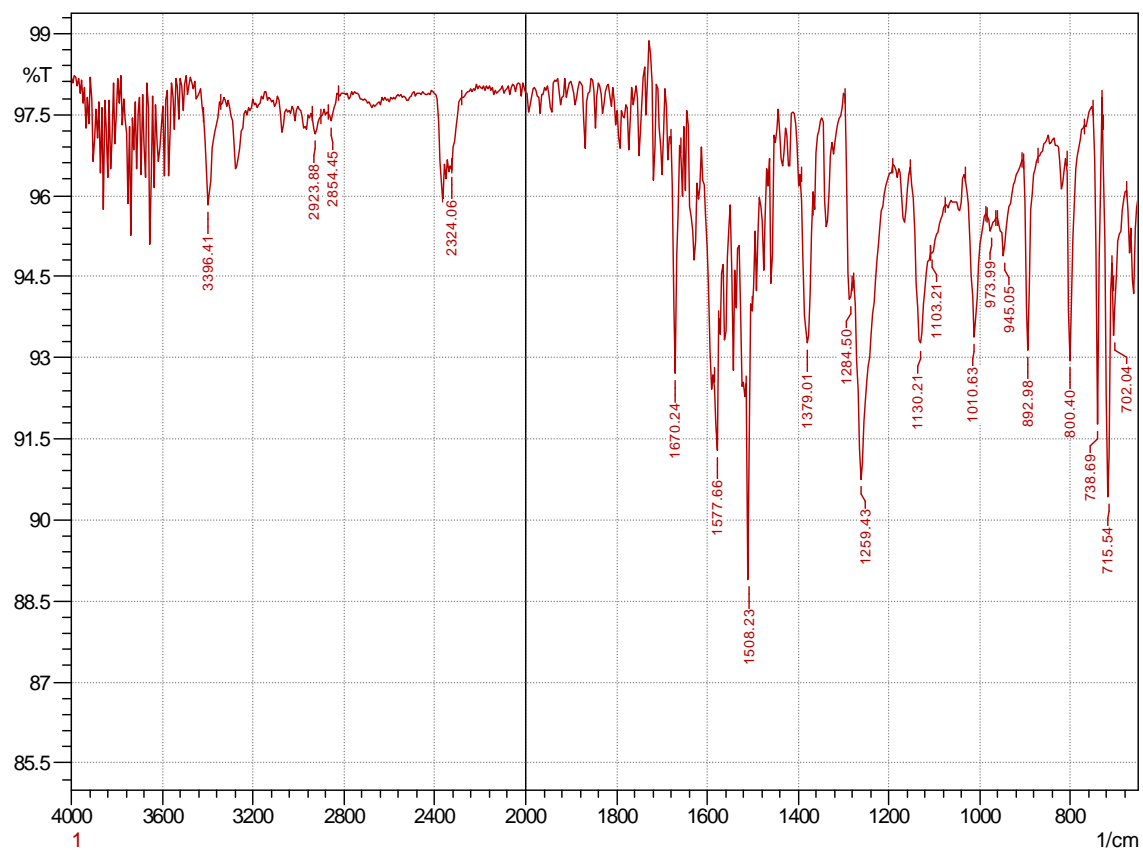

# Mass

1-amino-2,4-dibromoanthracene-9,10-dione

blank\_090212170658 #25 RT: 1.67 AV: 1 NL: 1.24E4  
F: - p ESI Full ms [ 150.00-1000.00]

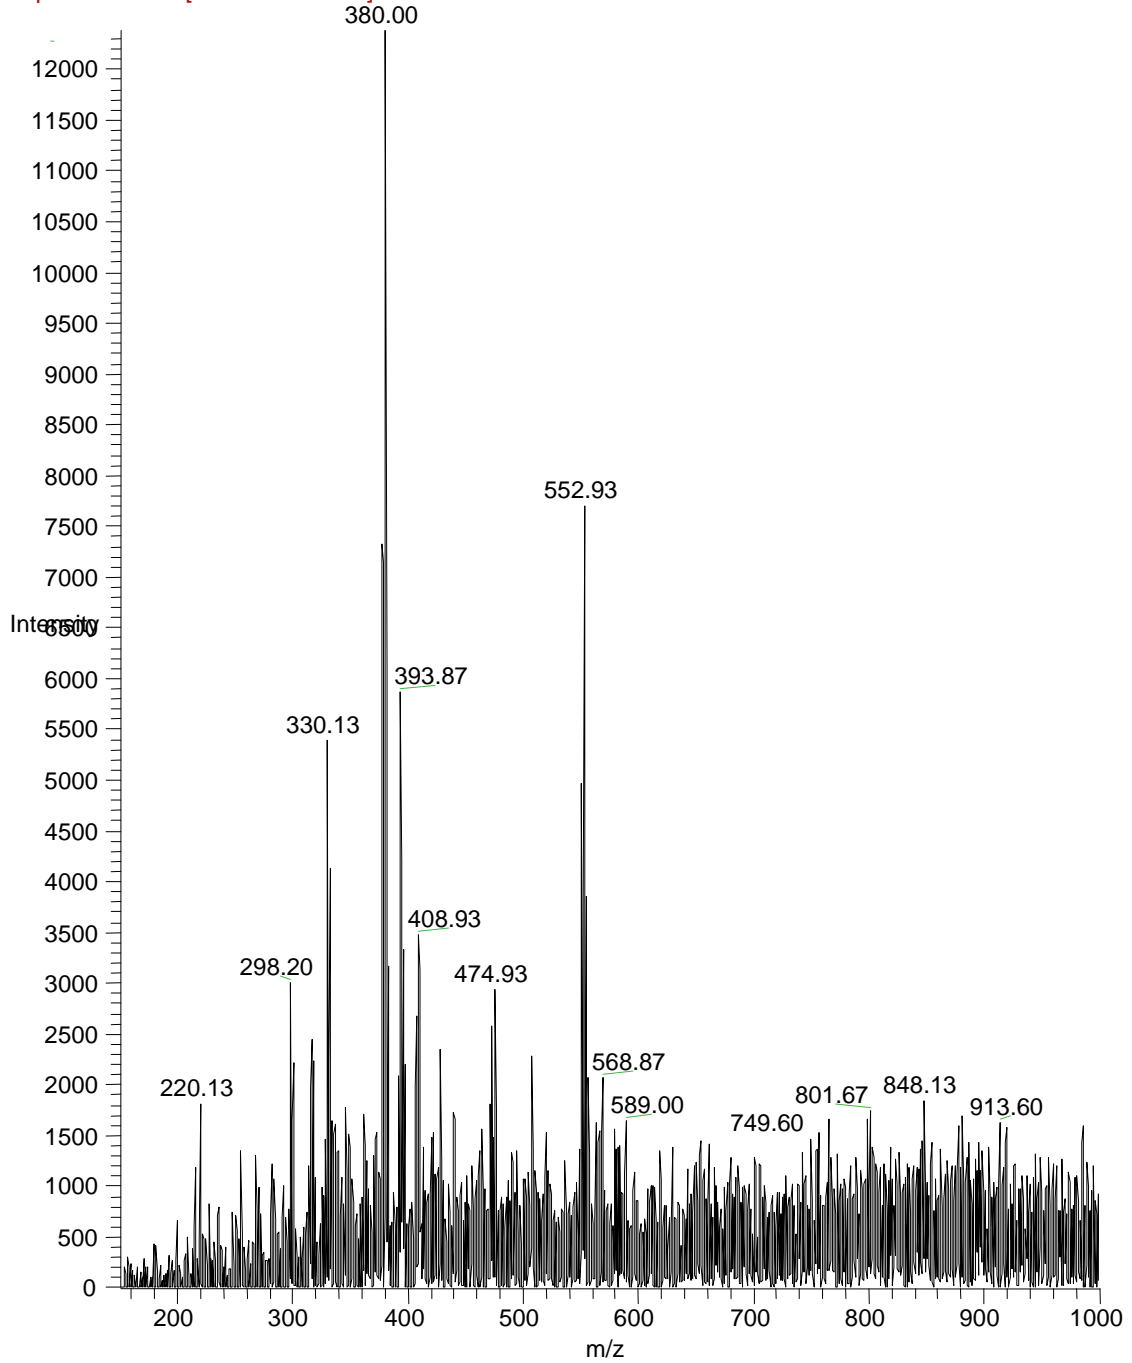



*1-amino-2,4-dibromo-5-chloroanthracene-9,10-dione*

11020912 #773 RT: 31.69 AV: 1 NL: 4.22E4  
T: - c ESI Full ms [ 100.00-1000.00]

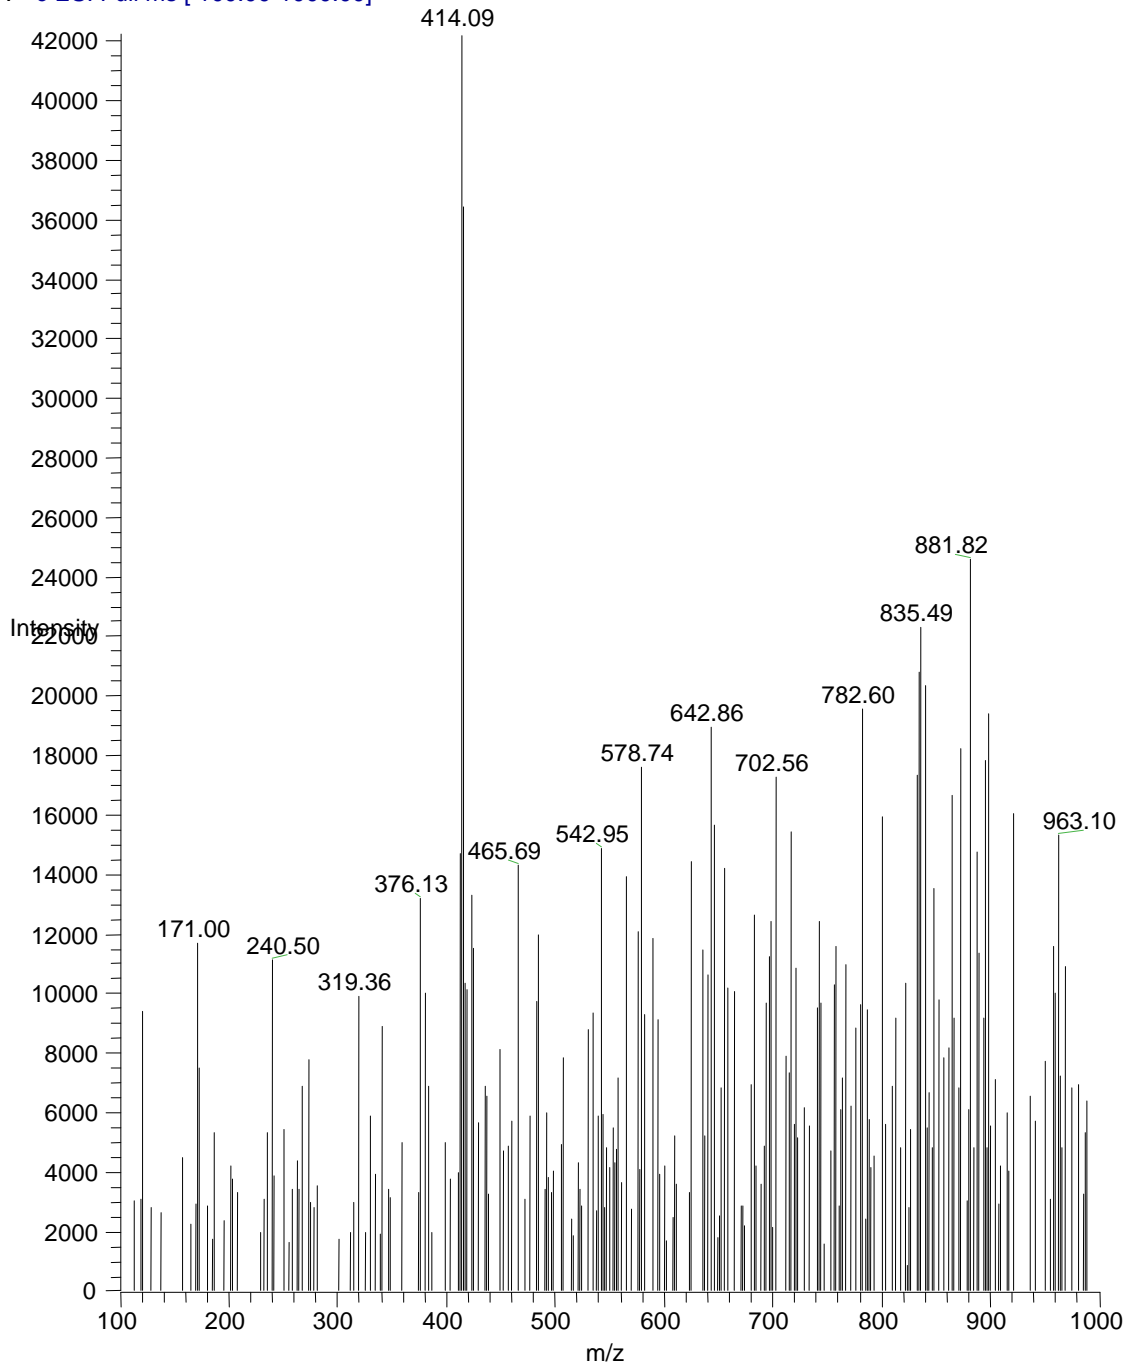

*1,5-diamino-4,8-dibromoanthracene-9,10-dione*

blank\_090210002728 #17 RT: 1.44 AV: 1 NL: 1.82E5

F: - p ESI Full ms2 553.00@0.00 [ 150.00-2000.00]

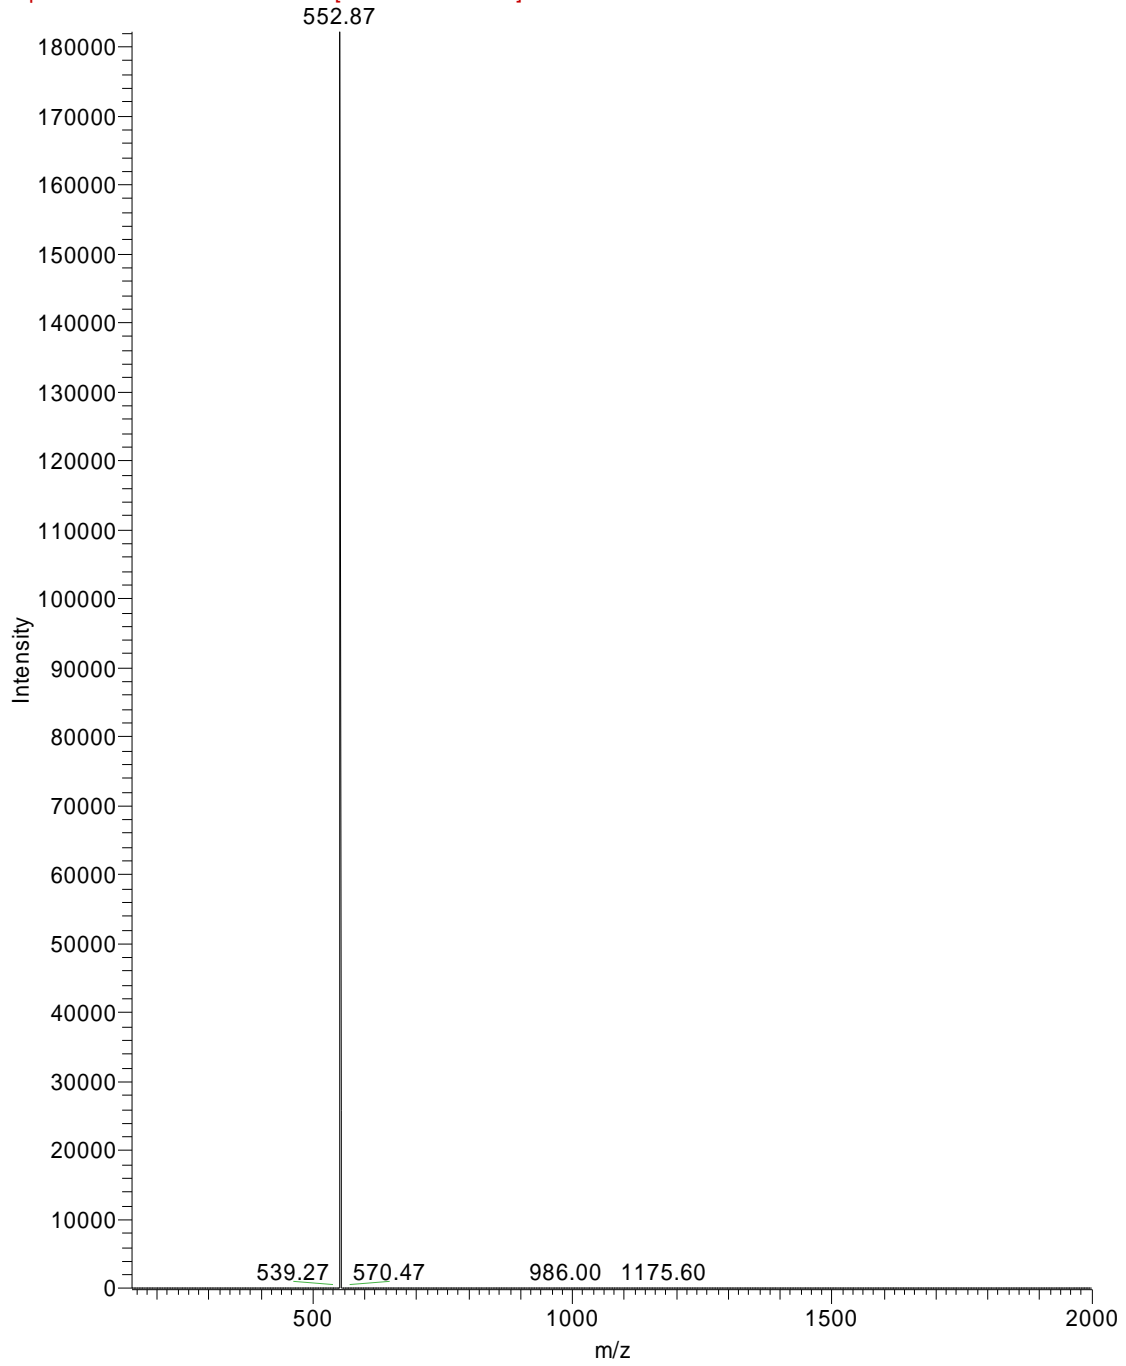

*1-bromo-4-(methylamino)anthracene-9,10-dione*

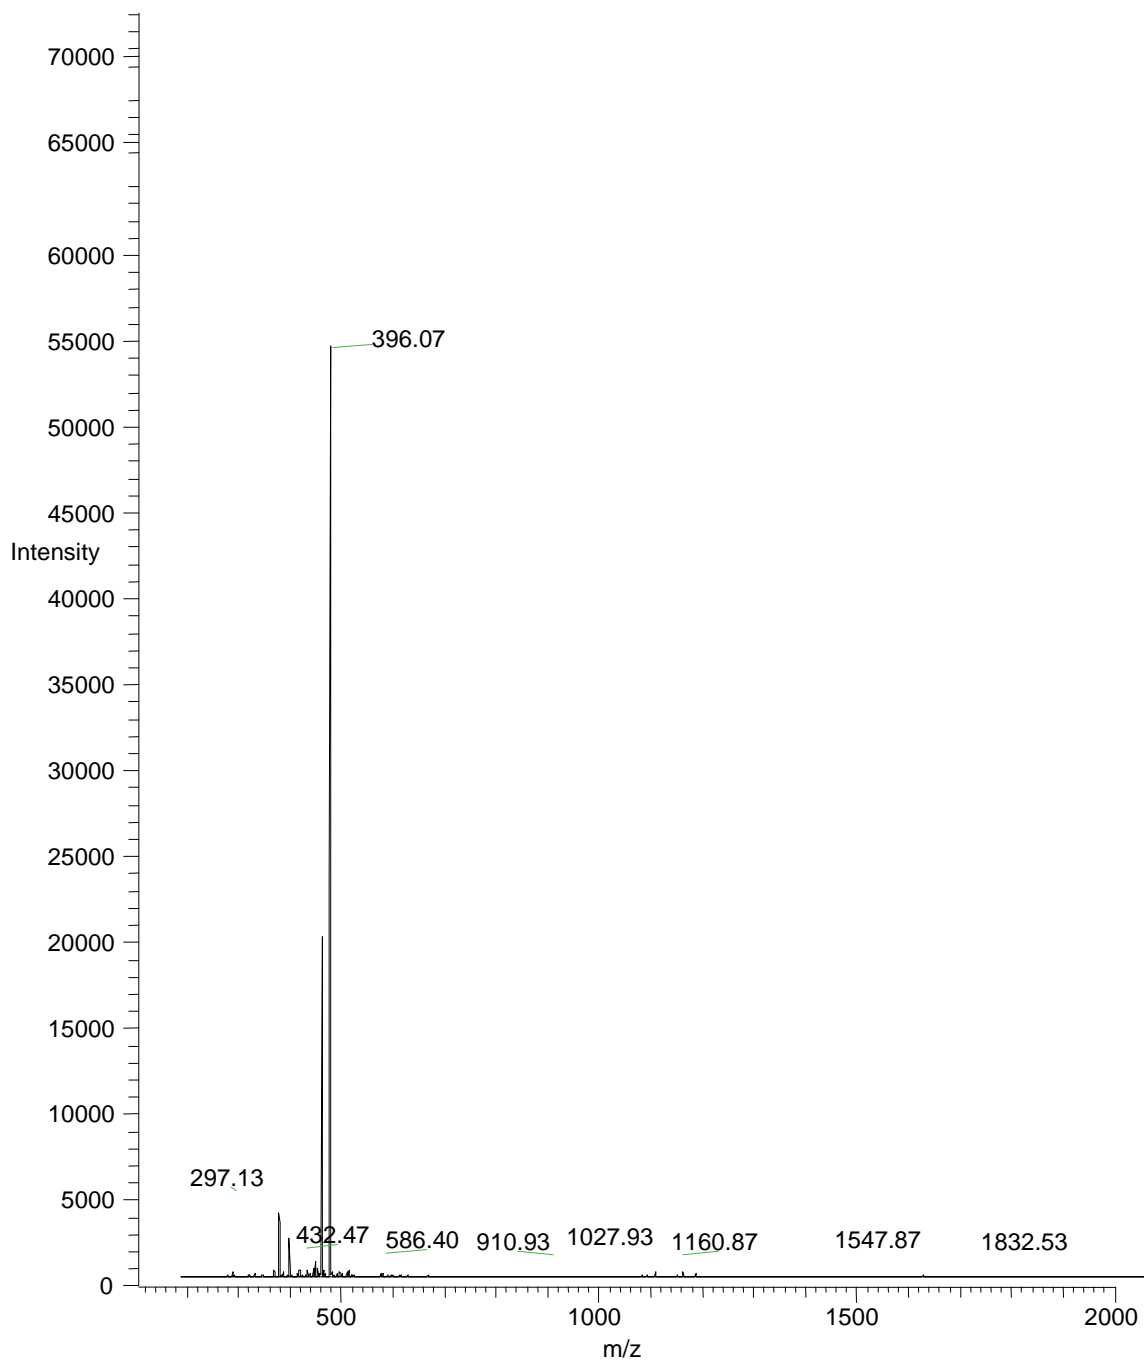

*1-amino-2-bromo-4-methoxyanthracene-9,10-dione*

S1fullms SAM NO 6 #53 RT: 2.69 AV: 1 NL: 3.69E4

F: - p ESI Full ms [ 175.00-640.00]

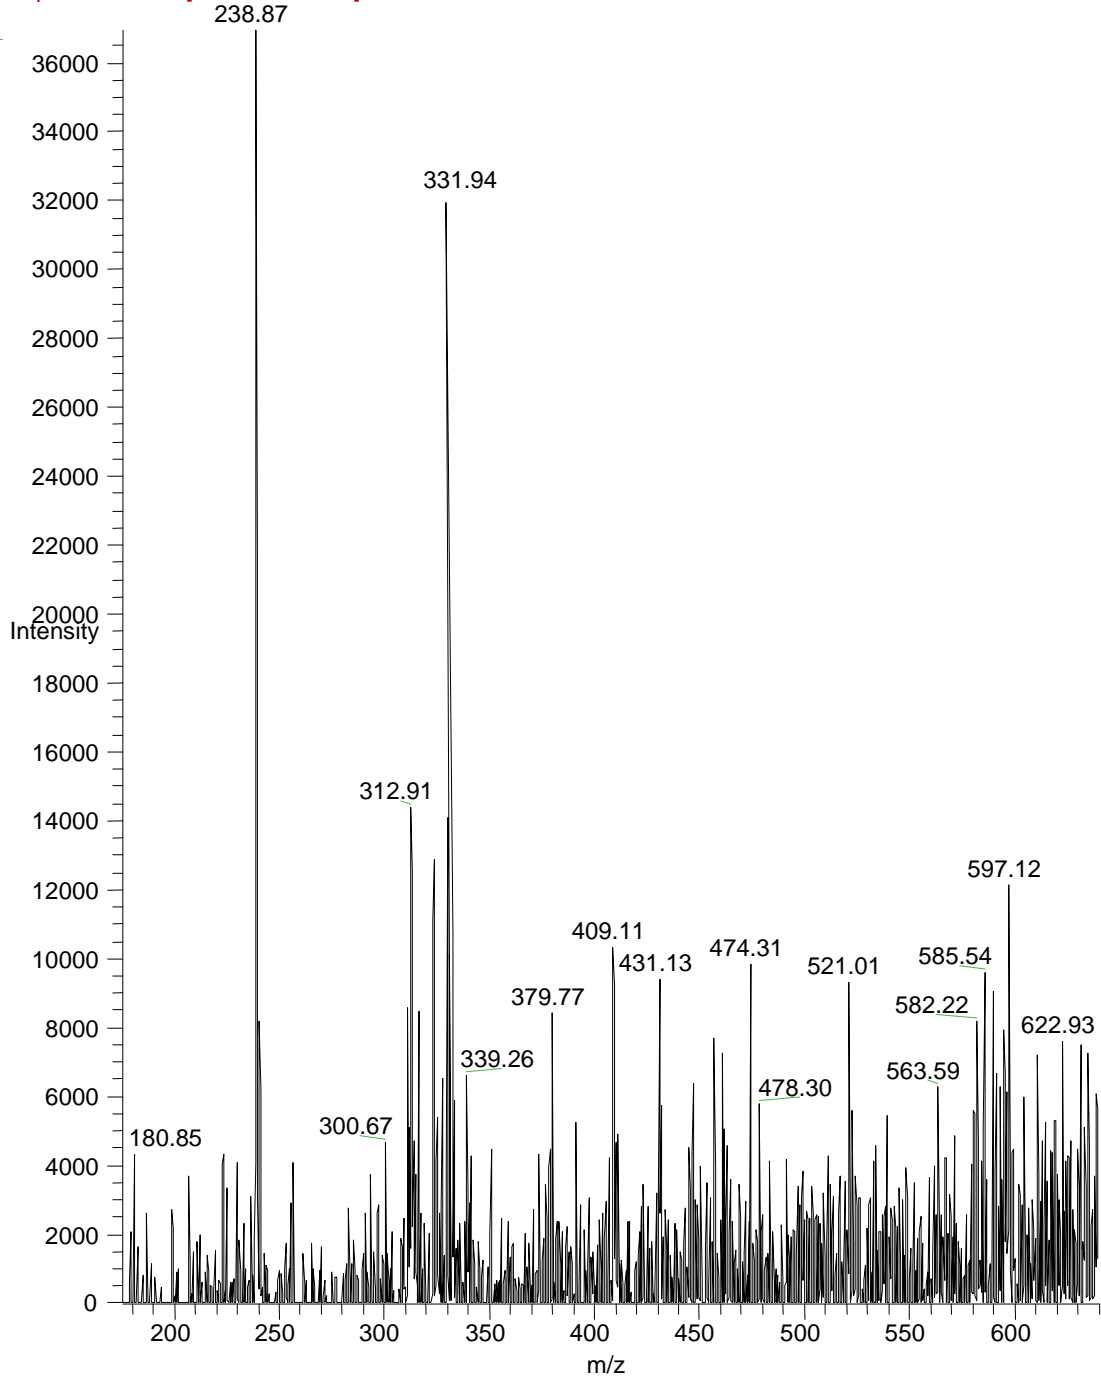

N-(1-Amino-2-bromo-9,10-dihydro-9,10-dioxoanthracen-4-yl) benzamide

KJ\_FULLMSBZRAW#16 RT: 0.18 AV: 1 NL: 6.35E5  
T: + p ESI Full ms [ 400.00-800.00]

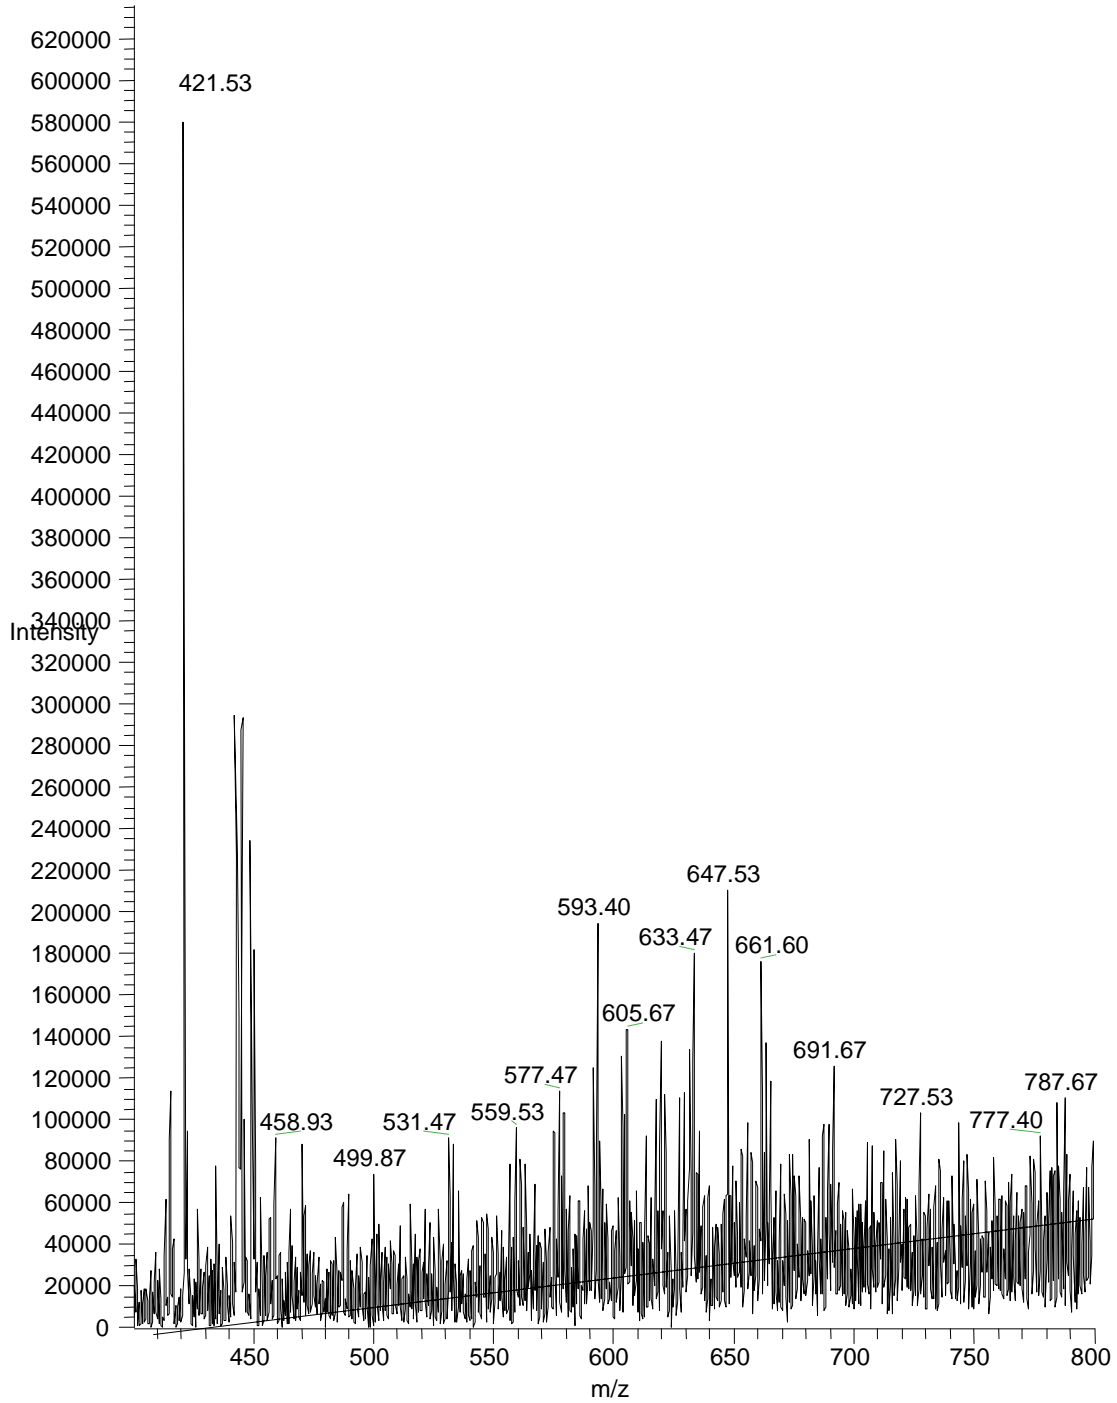

1-Amino-2-bromo-4-hydroxyanthracene-9,10-dione

KJ\_FULLMSRAW #17 RT: 0.25 AV: 1 NL: 6.71E5  
T: + p ESI Full ms [ 150.00-800.00]

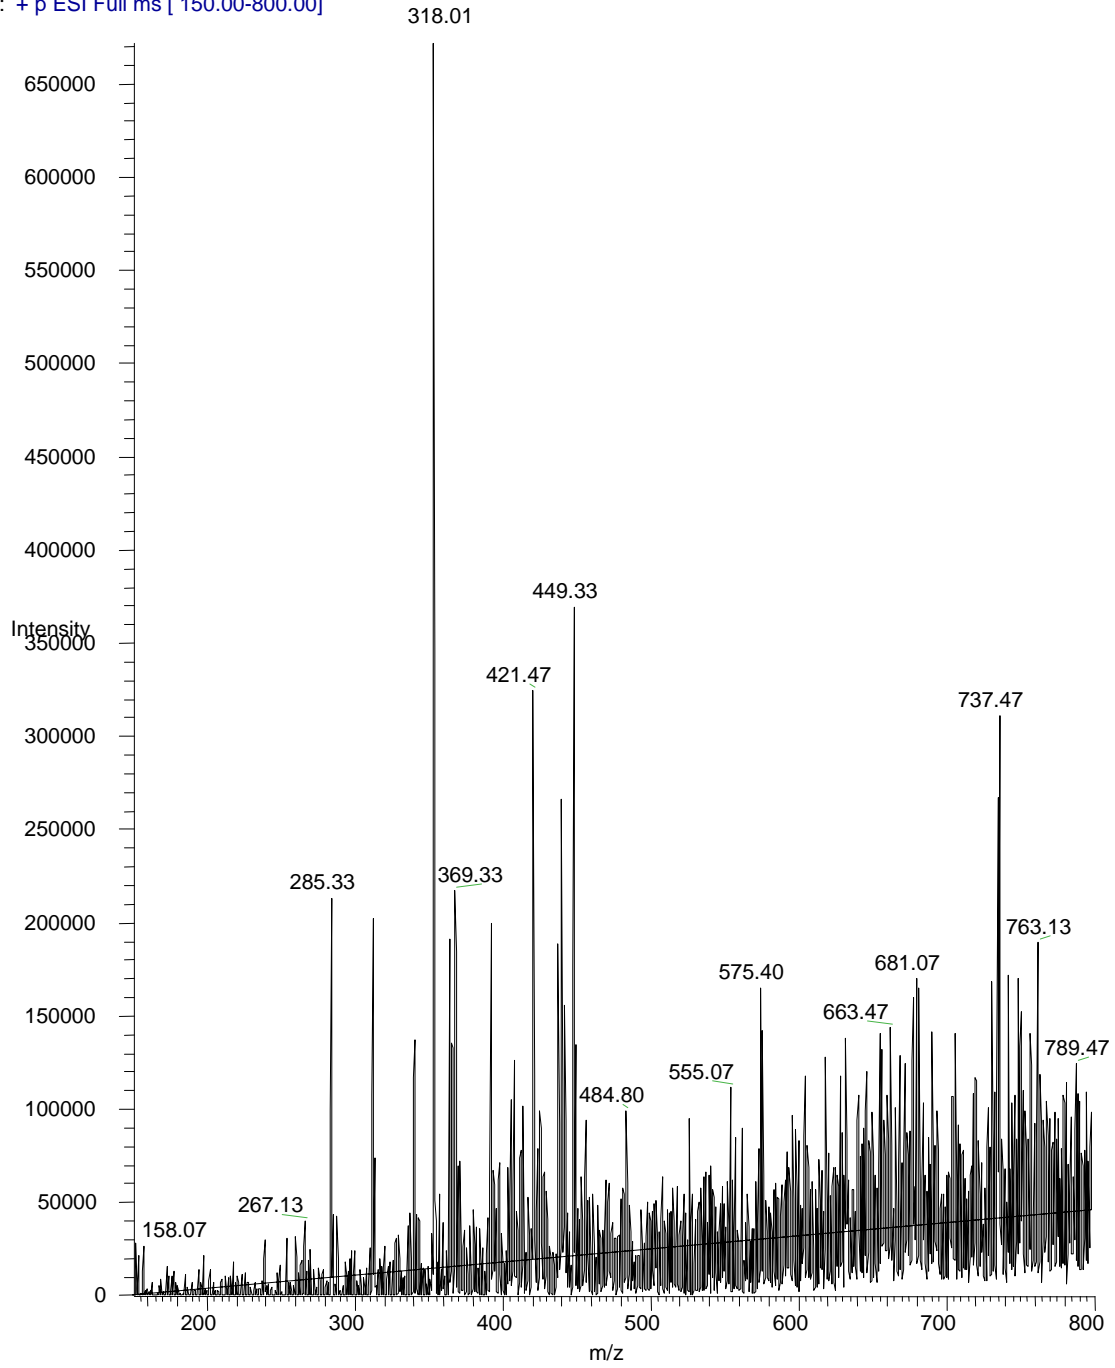

# <sup>1</sup>H NMR Spectra

*1-amino-2,4-dibromoanthracene-9,10-dione*

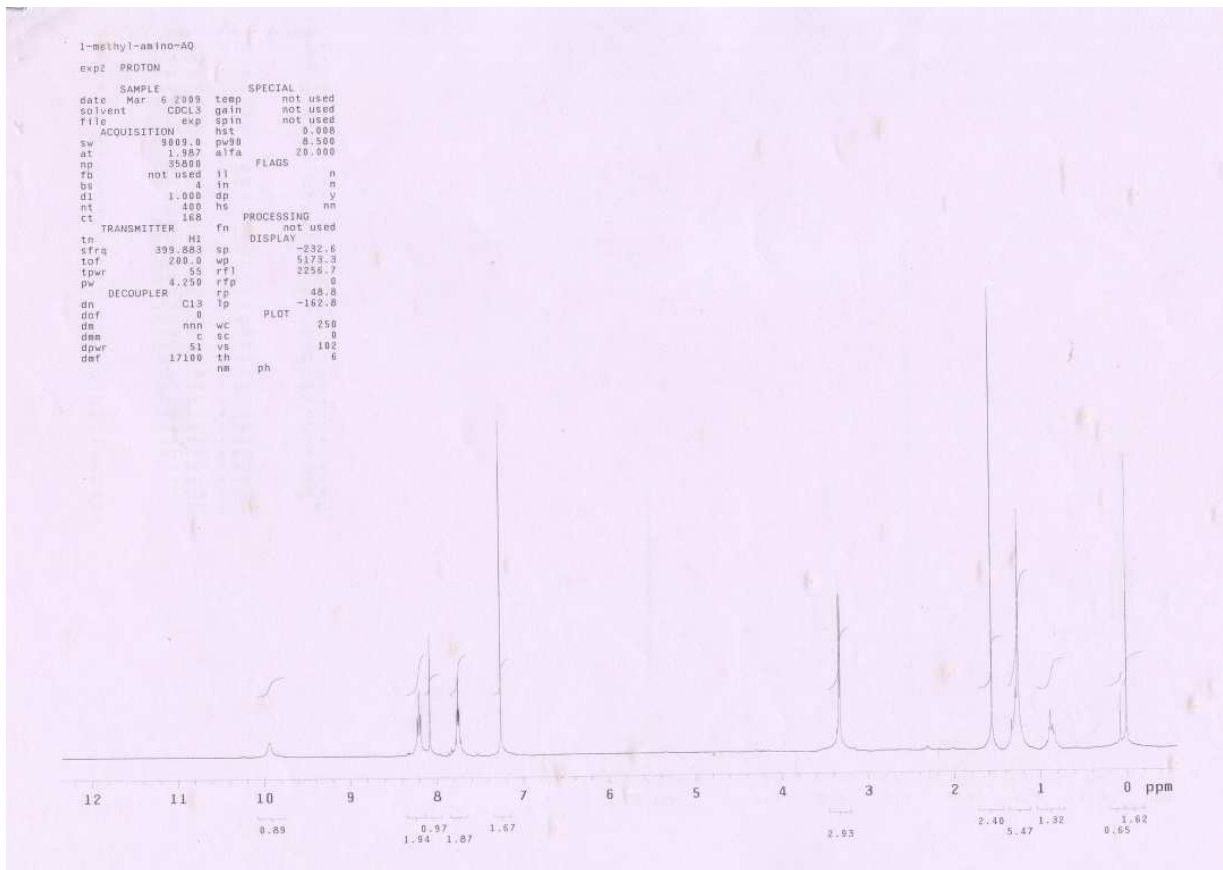

*1-amino-2,4-dibromo-5-chloroanthracene-9,10-dione*

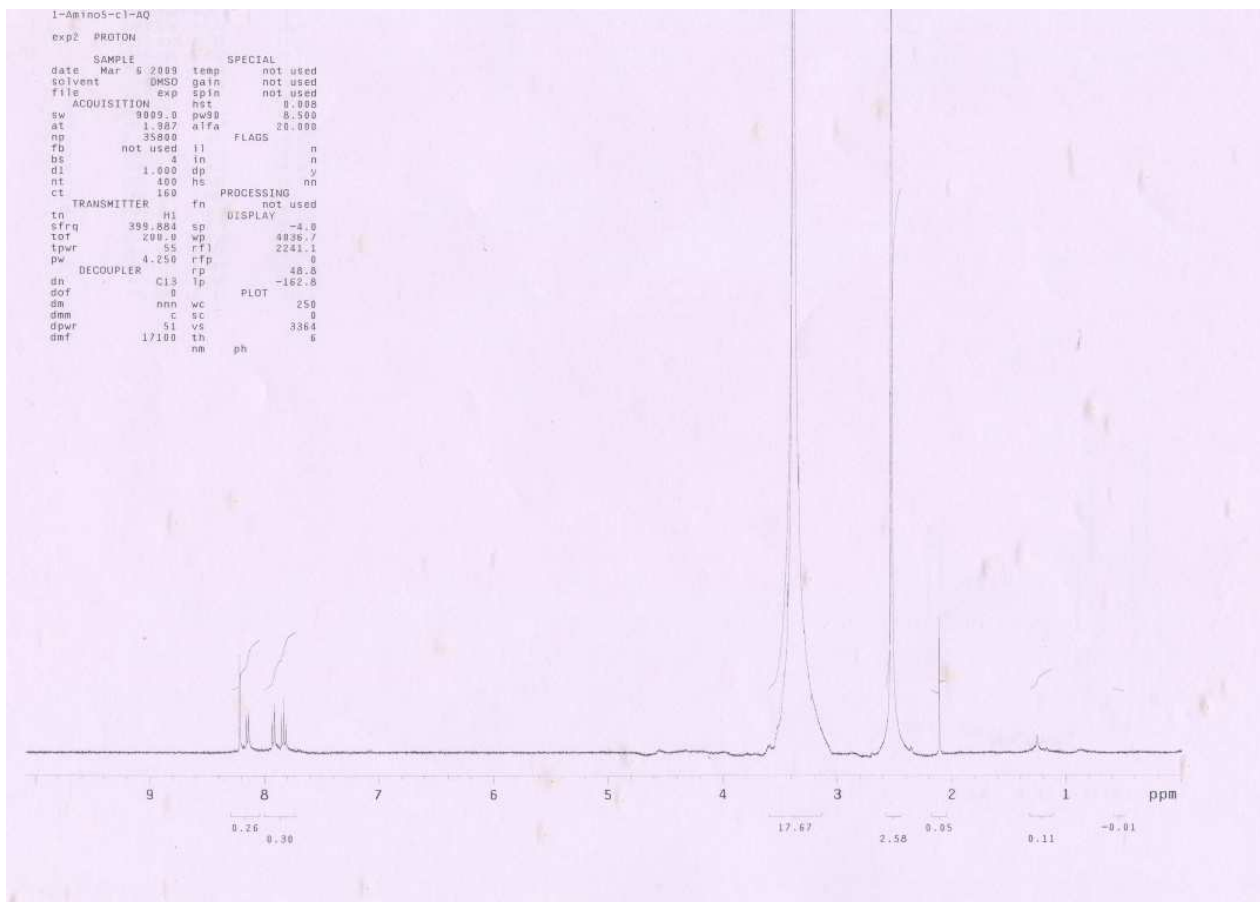



1,5-diamino-4,8-dibromoanthracene-9,10-dione

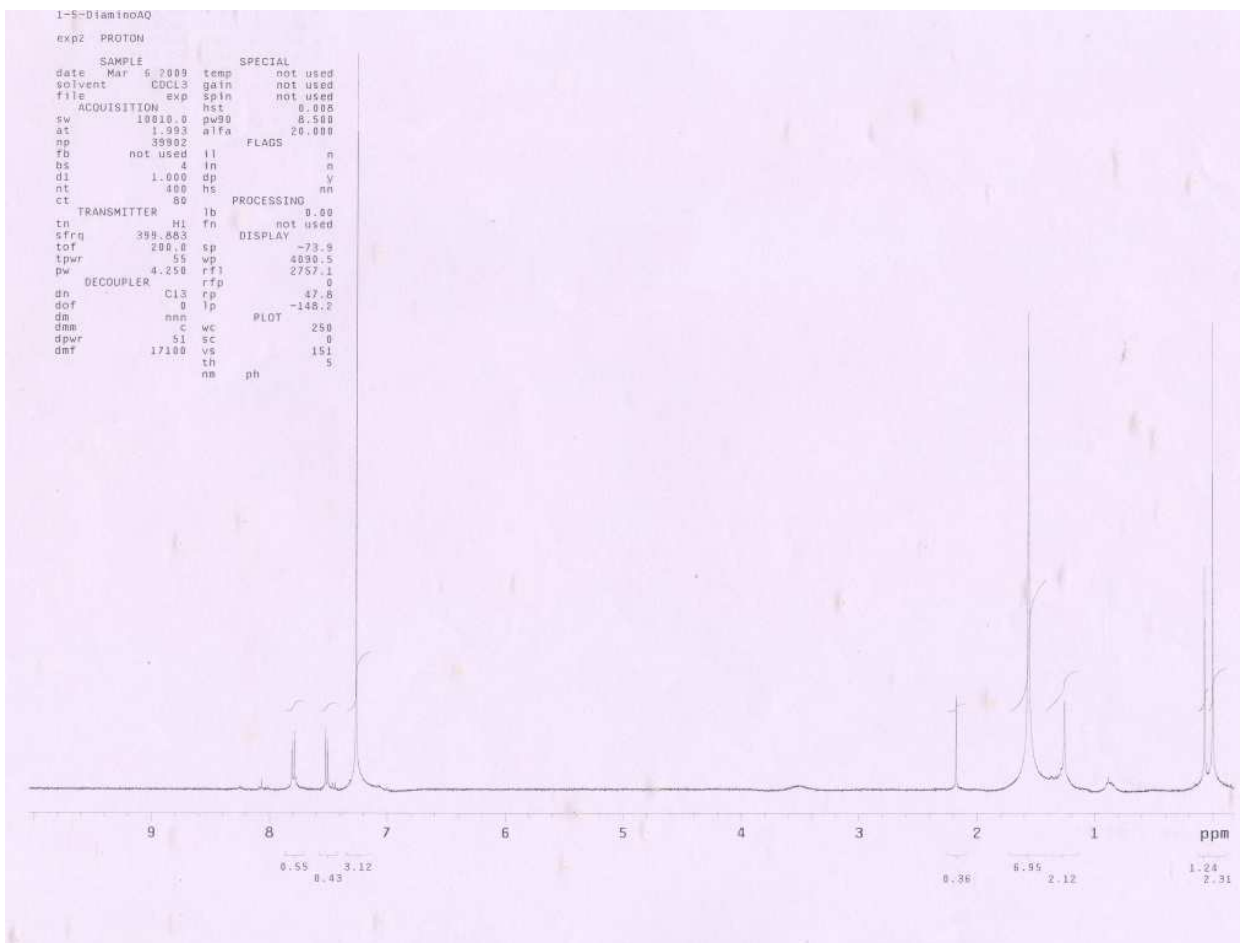

1-bromo-4-(methylamino)anthracene-9,10-dione

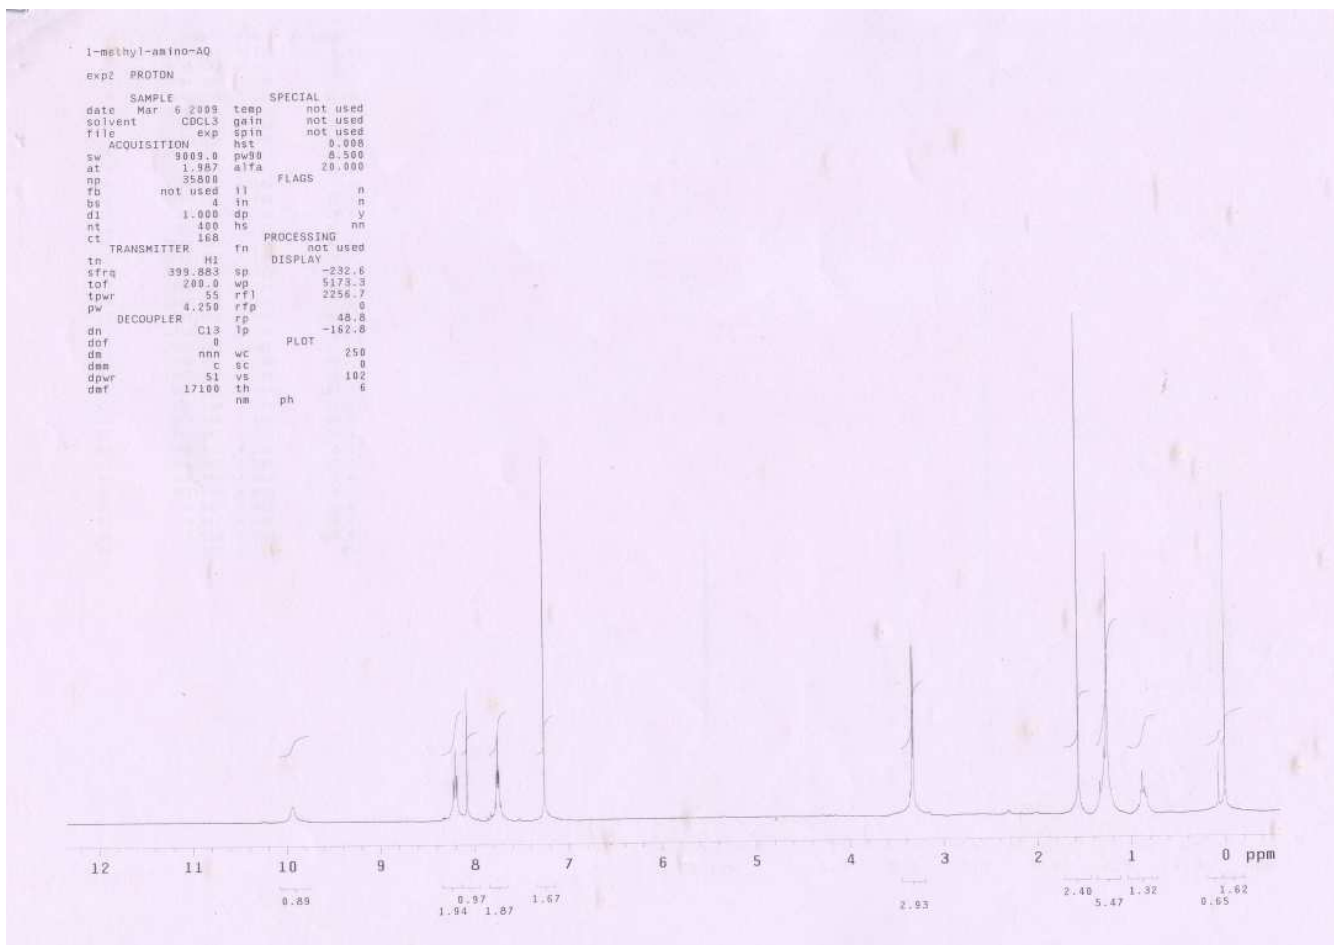

*1-amino-2-bromo-4-methoxyanthracene-9,10-dione*

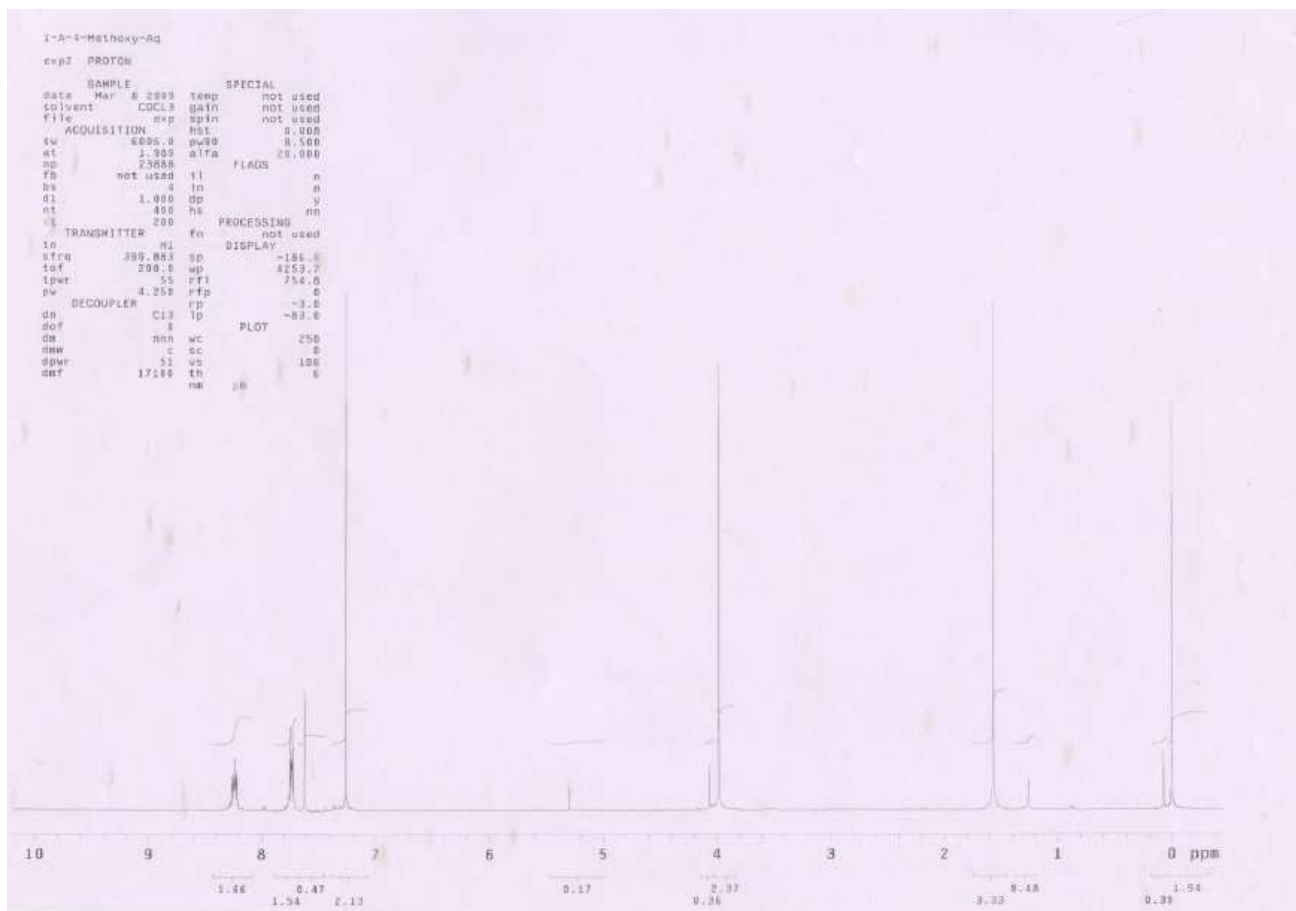

N-(1-Amino-2-bromo-9,10-dihydro-9,10-dioxoanthracen-4-yl) benzamide

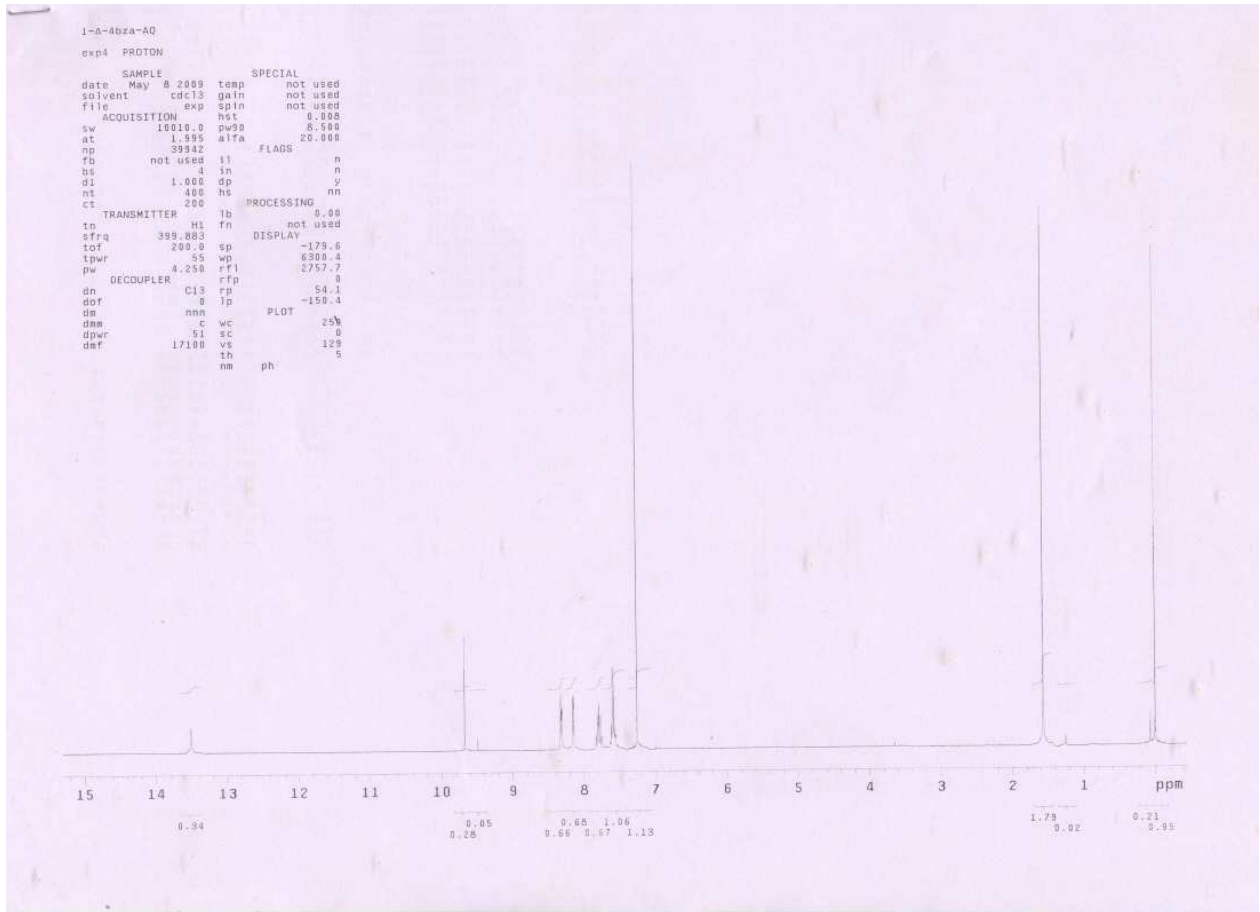

1-Amino-2-bromo-4-hydroxyanthracene-9,10-dione

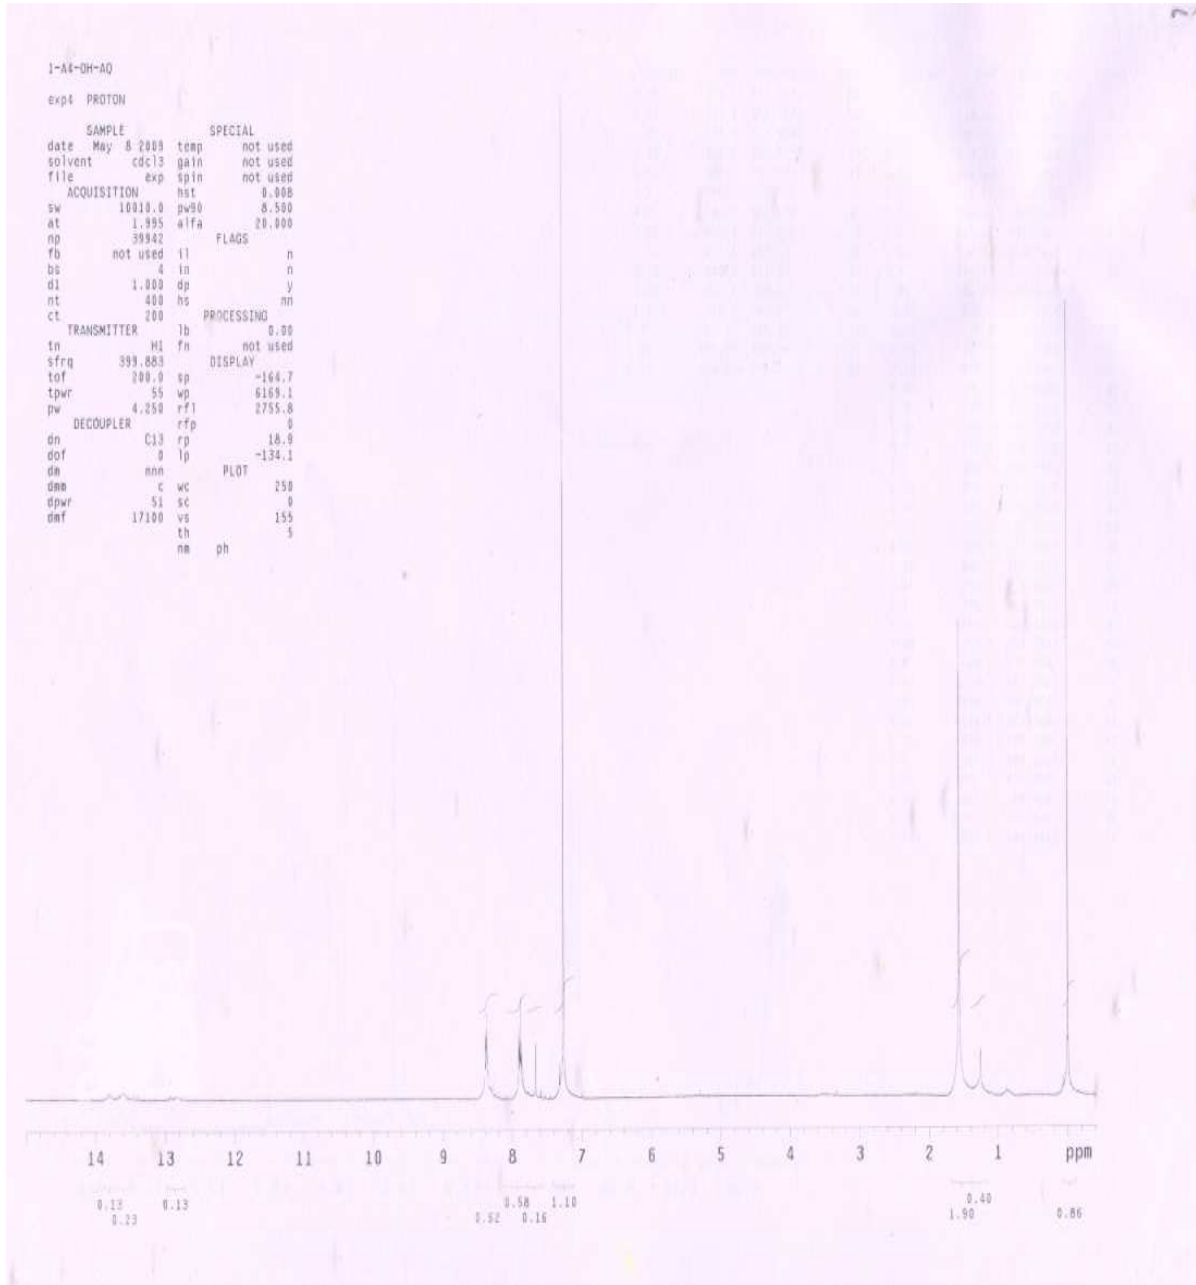

Supplement: b923589b.pdf [file b923589b.pdf]
